# Supplementary material for: Optimizing planting density and nitrogen input for improved nitrogen use efficiency, yield and seed quality in sesame
Source: Research Square preprint supplement (doi:10.21203/rs.3.rs-8083903/v1), 2025-11-26
Supplement: Supplementary file 1 [file 2bd916698395cd07e53817b7.pdf]

A

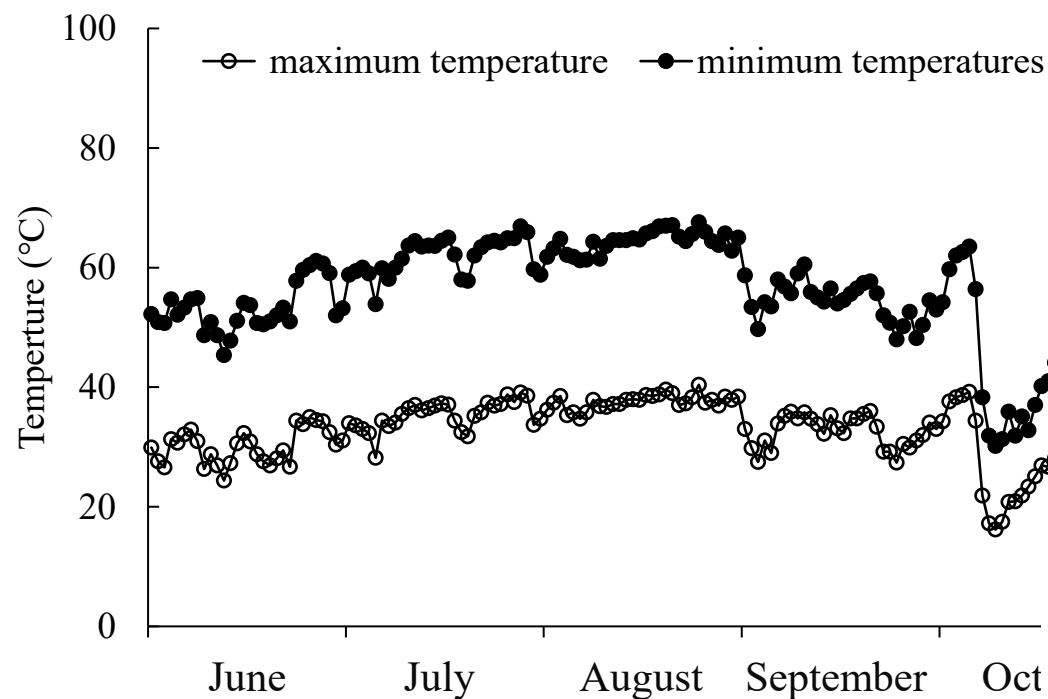

B

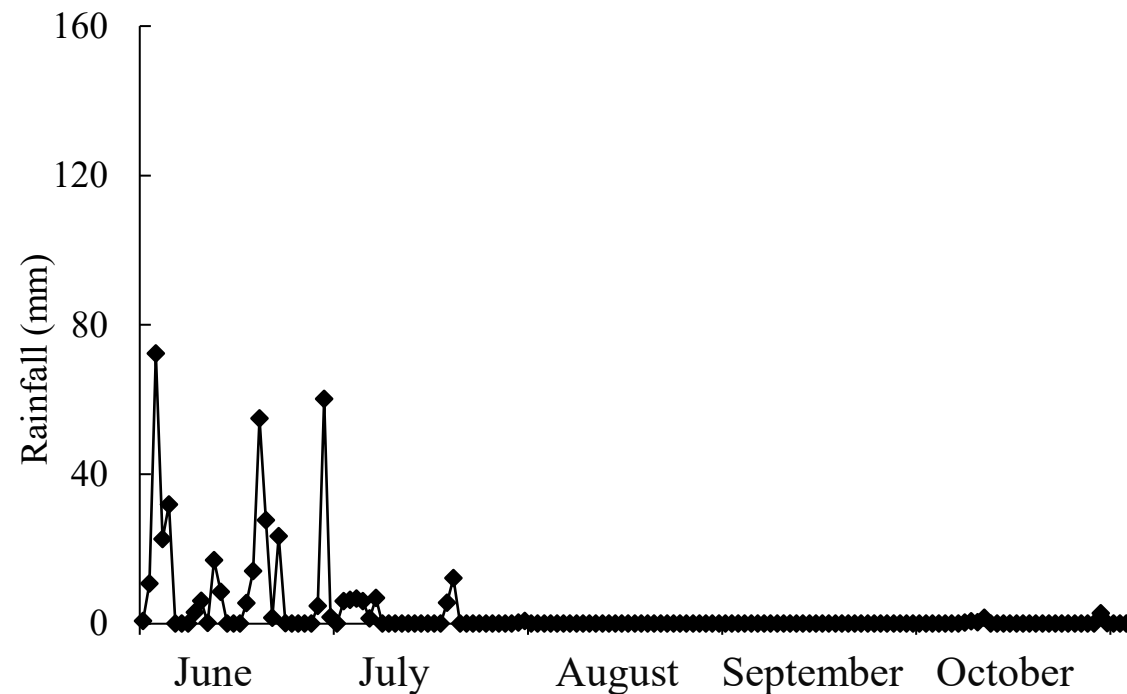

**Supplementary Figure 1.** Temperature and rainfall during the growing period in 2022. (A) Daily maximum temperature (●) and minimum temperatures. (B) Rainfall(◆).
